# Supplementary material
Source: PubMed Central journal article supplement (PMC3083177)
Supplement: supp_M111.230045_SupFig1.pdf [file supp_M111.230045_SupFig1.pdf]

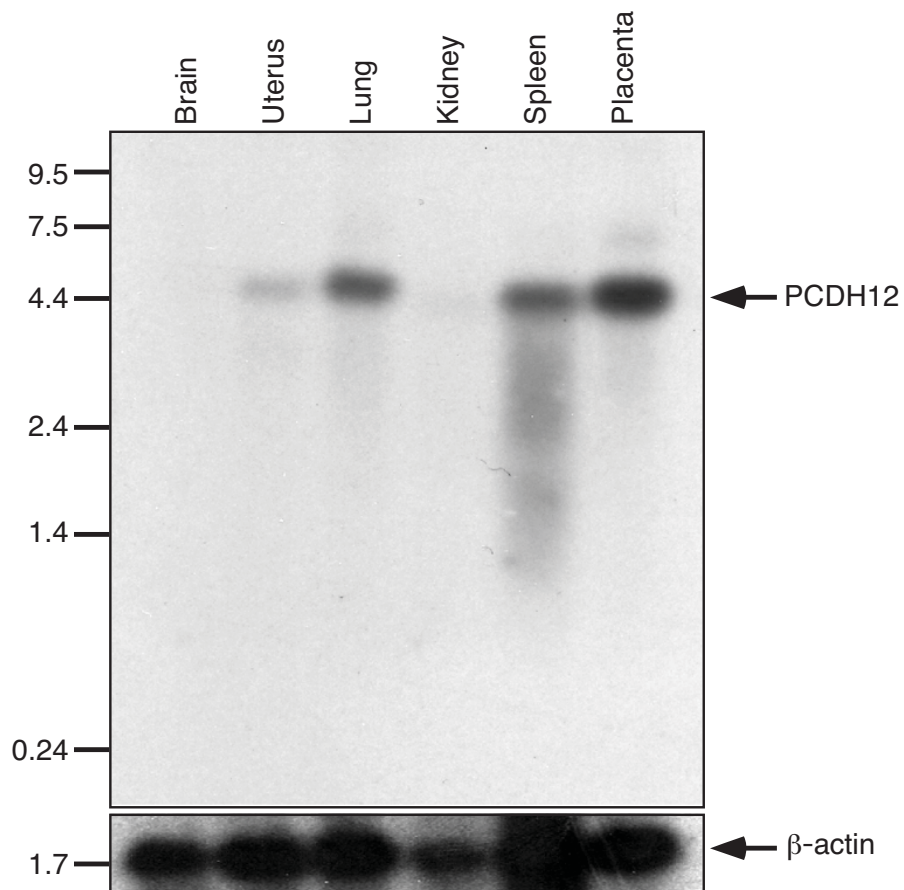

**Supplemental Fig. 1: Tissue distribution of Pcdh12 by northern blot analysis**

Method- Northern blots of human poly-A RNA (3  $\mu$ g) of various organs were purchased from BioChain (Hayward, CA) and hybridized with a  $^{32}$ P-radiolabeled probe consisting of a cDNA fragment coding for human PCDH12 cytoplasmic domain. Membrane were also hybridized with a  $^{32}$ P-radiolabeled cDNA probe coding for human  $\beta$ -actin. Size markers are indicated on the left in kb.

Result- A single transcript was detected for Pcdh12 at 4.4 kb. The smear observed for the spleen sample is likely due to RNA degradation.
