# Supplementary material
Source: PubMed Central journal article supplement (PMC3083177)
Supplement: supp_M111.230045_SupFig3.pdf [file supp_M111.230045_SupFig3.pdf]

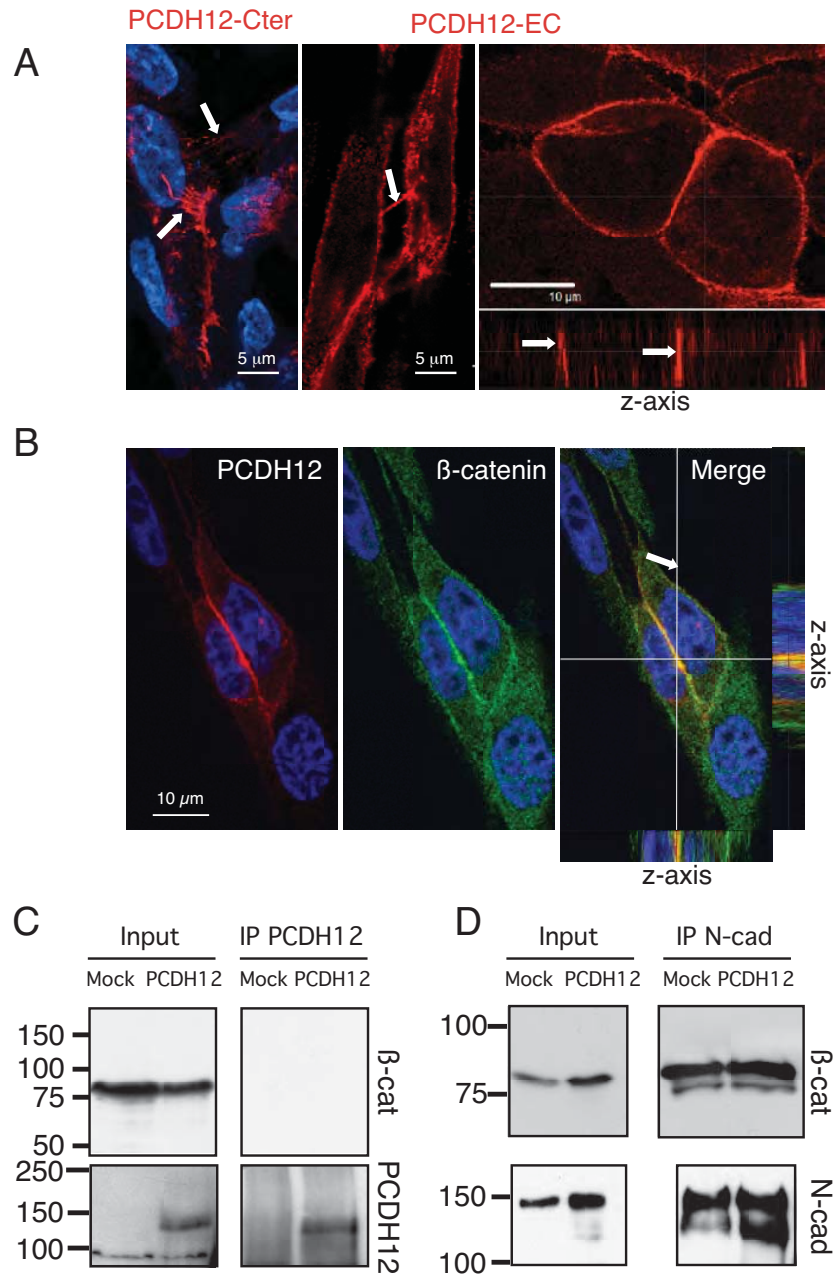

**Supplemental Fig. 3: PCDH12 localization at cell-cell junctions.**

(A) Confocal images of CHO-PCDH12 immunolabeled with anti-PCDH12 EC or Cter (red). Hoechst labeling of nuclei is in blue. Arrows show PCDH12 accumulation at cell-cell junctions, membrane ruffles or filopodia. (B) Colocalization of PCDH12 (red) and β-catenin (green) at cell-cell junctions by confocal microscopy. (C,D) Cadherin immunoprecipitation with β-catenin (β-cat). PCDH12 (C) or N-cadherin (D) were immunoprecipitated from mock or CHO-PCDH12 with anti-PCDH12 C-ter antibody. Blots were probed with anti-β-catenin, PCDH12 EC or N-cadherin antibodies, as indicated. Protein extracts were run in parallel (Input). No interaction could be detected between PCDH12 and β-catenin.
