# Supplementary material
Source: PubMed Central journal article supplement (PMC3083177)
Supplement: supp_M111.230045_SupFig5.pdf [file supp_M111.230045_SupFig5.pdf]

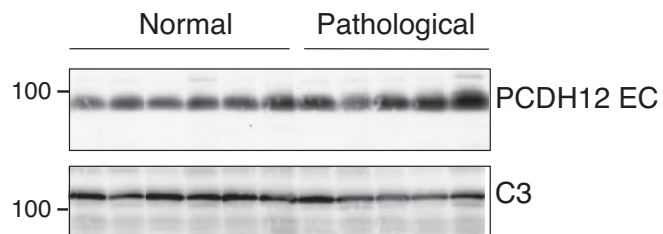

**Supplemental Fig. 5: Western blot analysis of maternal sera from normal or pathological pregnancies**

Methods- Sera (0.3  $\mu$ L) were analyzed by SDS-PAGE, transferred onto PVDF membranes and incubated with anti-PCDH12 EC and anti-complement component C3 antibodies and then with horse radish peroxidase-conjugated secondary antibodies. Luminescent signals were acquired with a Fusion-FX7 camera from Vilber Lourmat and quantified with ImageJ software.

Results- The figure is representative of several blots, in which 6 sera from normal gestations were compared to 5 sera from subsequent pathological gestations. One same serum was loaded in each experiment to normalize blot signals. The intraassay coefficients of variation of C3 signals were less than 8%. Altogether, 27 normal and 13 pathological sera were analyzed, and the results are represented in Fig. 9.
