# Supplementary material
Source: PubMed Central journal article supplement (PMC3083177)
Supplement: supp_M111.230045_SuppFig_4.pdf [file supp_M111.230045_SuppFig_4.pdf]

MMQLLQLLLGLLGPGGYLFLLGDCQEVTTLTVKYQVSEEVPSGTVIGKLSQELGREERRR  
QAGAAFQVLQLPQALPIQVDSEGLLSTGRRLDREQLCRQWDPCLVSFDVLATGDLALI  
HVEIQVLDINDHQPRFPKGEQEISESASLRTRIPLDRALDPDTGPNTLHTYTLSPSEHFA  
LDVIVGPDETKEHAELIVVKELDREIHSFFDLVLTAYDNGNPPKSGTSLVKVNVLDSNDNSP  
AFAESSLALEIQEDAAPGTLLIKLTATDPDQGPNGEVEFFLSKHMPPEVLDTFSIDAKTGQ  
VILRRPLDYEKNPAYEVDVQARDLGPNPIPAHCKVLIKVLDVNDNIPSIHVTWASQPSLVS  
EALPKDSFIALVMADDLDSGHNGLVHCWLSQELGHFRLKRTNGNTYMLLTNATLDREQ  
WPKYTLTLLAQDQGLQPLSAKKQLSIQISDINDNAPVFEKSRYEVESTRENNLPSLHLITIKA  
HDADLGINGKVSYRIQDSPVAHLVAIDSNTGEVTAQRSLN YEEMAGFEFQVIAEDSGQP  
MLASSVSVWVSLLDANDNAPEVVQPVLSDGKASLSVLVNASTGHLLVPIETPNGLGPA  
GTDTPLATHSSRPFLTTIVARDADSGANGEPLYSIRSGNEAHLFILNPHTGQLFVNVTN  
ASSLIGSEWELEIVVEDQGSPPLQTRALLRVMFVTSVDHLRDSARKPGALSMSMLTVICL  
AVLLGIFGLIALFMSICRTEKKDNRAYNCREAESTYRQQPKRPQKHIQKADIHLVPVLRG  
QAGEPCEVGQSHKDVDKEAMMEAGWDPCLQAPFHLTPTLYRTLNRNQGNGGAPAESR  
EVLQDTVNULLFNHPRQRNASRENLNLEPEQPATGQPRSRPLKVAGSPTGRLAGDQGSE  
EAPQRPPASSATLRRQRHLNGKVSPEKESGPRQILRSLVRLSVAFAERNPVEELTVDSP  
PVQQISQLLSLLHQGFQPKPNHRGNKYLAKPGGSRSAIPDTDGPSARAGGQTDPEQE  
EGPLDPEEDLSVKQLLEELSSLLDPSTGLALDRLSAPDPAWMARLSLPLTTNYRDNVIS  
PDAAATEEPRTFQTFGKAEAPELSPTGTRLASTFVSEMSSLLEMLLEQRSSMPVEAASE  
ALRRLSVCGRTLSLDLATSAAAGMKVQGDPPGGKTGTGKSRGSSSSSRCL

**Supplemental Fig. 4: Mass spectrometry analysis of urine: peptide coverage of PCDH12 sequence.**

*Methods.* Urines were collected and pooled from 4 healthy volunteers after informed consent. To enhance the detection of low abundance proteins, samples were first treated with the ProteoMiner kit from BioRad consisting of a highly diverse library of hexapeptides bound to chromatographic supports, thereby decreasing the dynamic concentration range of the protein sample. Briefly, samples were treated according to the manufacturer's protocols and the eluted protein fractions were deposited on a 1D-SDS-PAGE before being subjected to a short separation (pseudo-stacking). After Coomassie staining, proteins were digested in-gel with trypsin. All fractions were analyzed with LC-MS/MS in triplicate, as described previously (Dos Santos A., Court M., Thiers V., Sar S., Guettier C., Samuel D., Brechot C., Garin J., Demaugre F., Masselon CD. (May 31, 2010) Mol Cell Proteomics M110.000026, PMID: 20513801).

*Results.* Seven peptides (in red) specific of human PCDH12 sequence were detected, with high scores. The transmembrane and cytoplasmic domains are in blue.
